# Supplementary material
Source: PubMed Central journal article supplement (PMC8786260)
Supplement: NIHMS1770049-supplement-Sup_table.pdf [file NIHMS1770049-supplement-Sup_table.pdf]

**Supplemental Table 1 | Contributing institutions**

| Center                                            | <i>n</i> |
|---------------------------------------------------|----------|
| Boston University                                 | 9        |
| Columbia University Medical Center                | 13       |
| Emory University                                  | 7        |
| Johns Hopkins University                          | 27       |
| Massachusetts Alzheimer's Disease Research Center | 27       |
| Mayo Clinic                                       | 16       |
| Newcastle University                              | 23       |
| Northwestern University                           | 5        |
| Oregon Health Sciences University                 | 68       |
| University of Pittsburgh                          | 17       |
| Rush University Medical Center                    | 48       |
| Icahn School of Medicine at Mount Sinai           | 113      |
| Banner Sun Health Research Institute              | 84       |
| University of California, Irvine                  | 39       |
| University of California, San Diego               | 3        |
| University of Kentucky                            | 18       |
| University of Pennsylvania                        | 19       |
| University of Texas Southwestern                  | 25       |
| University of Washington                          | 20       |
| Medical University of Vienna                      | 21       |
| Washington University in Saint Louis              | 45       |

**Supplemental Table 2** | Association of rs56405341 with braak stage in PART

| <b>Test conditions</b>              | <b>Sample size (<i>n</i>)</b> | <b>Beta</b> | <b>Standard error</b> | <b>Z-score</b> | <b>L95</b> | <b>U95</b> | <b>t-statistic</b> | <b><i>p</i></b> |
|-------------------------------------|-------------------------------|-------------|-----------------------|----------------|------------|------------|--------------------|-----------------|
| Braak stage, Global Screening array | 207                           | 0.203       | 0.082                 | 2.48           | 0.042      | 0.364      | 2.48               | 1.42E-02        |
| Braak stage, Omni-express chip      | 440                           | 0.279       | 0.056                 | 4.94           | 0.168      | 0.389      | 4.94               | 1.11E-06        |
| Meta analysis                       | 647                           | -           | -                     | 5.404          | -          | -          | -                  | 5.61E-8 (++)    |

**Supplemental Table 3** | Associations with Braak stage in PART ( $p < 5.0E-06$ )

| Chr | SNP         | Base pair | A1 | Beta    | SE      | L95     | U95     | t-statistic | p        |
|-----|-------------|-----------|----|---------|---------|---------|---------|-------------|----------|
| 2   | rs78580932  | 11935322  | C  | -0.5493 | 0.1068  | -0.7586 | -0.3401 | -5.146      | 3.55E-07 |
| 2   | rs74600760  | 235768810 | T  | -0.5306 | 0.1092  | -0.7446 | -0.3166 | -4.86       | 1.48E-06 |
| 3   | rs111610564 | 61518166  | C  | -0.4981 | 0.1034  | -0.7007 | -0.2955 | -4.818      | 1.81E-06 |
| 3   | rs75367690  | 61518193  | A  | -0.4981 | 0.1034  | -0.7007 | -0.2955 | -4.818      | 1.81E-06 |
| 3   | rs78367818  | 61518380  | T  | -0.484  | 0.1017  | -0.6834 | -0.2846 | -4.757      | 2.43E-06 |
| 3   | rs76293999  | 61518765  | C  | -0.4981 | 0.1034  | -0.7007 | -0.2955 | -4.818      | 1.81E-06 |
| 3   | rs80325426  | 61521640  | T  | -0.4981 | 0.1034  | -0.7007 | -0.2955 | -4.818      | 1.81E-06 |
| 3   | rs349509    | 140216029 | A  | -0.7761 | 0.1562  | -1.082  | -0.47   | -4.969      | 8.64E-07 |
| 3   | rs13323081  | 179019705 | G  | 0.2428  | 0.04697 | 0.1507  | 0.3348  | 5.169       | 3.16E-07 |
| 3   | rs13078538  | 179020722 | A  | 0.235   | 0.0469  | 0.1431  | 0.3269  | 5.011       | 7.01E-07 |
| 4   | rs56405341  | 130085480 | A  | 0.2555  | 0.04625 | 0.1649  | 0.3462  | 5.524       | 4.82E-08 |
| 4   | rs17431373  | 130096062 | A  | 0.2403  | 0.04701 | 0.1482  | 0.3325  | 5.112       | 4.21E-07 |
| 4   | rs11729109  | 130096820 | A  | 0.2403  | 0.04701 | 0.1482  | 0.3325  | 5.112       | 4.21E-07 |
| 4   | rs1588808   | 130099986 | C  | 0.2403  | 0.04701 | 0.1482  | 0.3325  | 5.112       | 4.21E-07 |
| 4   | rs59779898  | 130104994 | T  | 0.2423  | 0.04665 | 0.1508  | 0.3337  | 5.193       | 2.78E-07 |
| 4   | rs61470543  | 130105269 | T  | 0.2403  | 0.04701 | 0.1482  | 0.3325  | 5.112       | 4.21E-07 |
| 4   | rs35311431  | 130107476 | T  | 0.2403  | 0.04701 | 0.1482  | 0.3325  | 5.112       | 4.21E-07 |
| 4   | rs34495244  | 130107609 | G  | 0.2403  | 0.04701 | 0.1482  | 0.3325  | 5.112       | 4.21E-07 |
| 4   | 4:130107649 | 130107649 | C  | 0.2403  | 0.04701 | 0.1482  | 0.3325  | 5.112       | 4.21E-07 |
| 4   | rs13131099  | 130107755 | C  | 0.2403  | 0.04701 | 0.1482  | 0.3325  | 5.112       | 4.21E-07 |
| 4   | rs13131323  | 130107819 | G  | 0.2403  | 0.04701 | 0.1482  | 0.3325  | 5.112       | 4.21E-07 |
| 4   | rs13103701  | 130107864 | T  | 0.2403  | 0.04701 | 0.1482  | 0.3325  | 5.112       | 4.21E-07 |
| 4   | rs13137298  | 130108224 | C  | 0.2403  | 0.04701 | 0.1482  | 0.3325  | 5.112       | 4.21E-07 |
| 4   | 4:130108226 | 130108226 | A  | 0.2403  | 0.04701 | 0.1482  | 0.3325  | 5.112       | 4.21E-07 |
| 4   | rs13110313  | 130108278 | A  | 0.2403  | 0.04701 | 0.1482  | 0.3325  | 5.112       | 4.21E-07 |
| 4   | rs11731055  | 130108518 | T  | 0.2403  | 0.04701 | 0.1482  | 0.3325  | 5.112       | 4.21E-07 |
| 4   | rs17790747  | 130112972 | A  | 0.2403  | 0.04701 | 0.1482  | 0.3325  | 5.112       | 4.21E-07 |
| 4   | rs60645642  | 130113055 | T  | 0.2403  | 0.04701 | 0.1482  | 0.3325  | 5.112       | 4.21E-07 |
| 4   | rs11099002  | 130114081 | A  | 0.2403  | 0.04701 | 0.1482  | 0.3325  | 5.112       | 4.21E-07 |
| 4   | rs10518545  | 130114848 | G  | 0.2361  | 0.04689 | 0.1442  | 0.3279  | 5.035       | 6.24E-07 |
| 4   | rs11737273  | 130115077 | A  | 0.2361  | 0.04689 | 0.1442  | 0.3279  | 5.035       | 6.24E-07 |
| 4   | rs11732872  | 130115144 | T  | 0.2361  | 0.04689 | 0.1442  | 0.3279  | 5.035       | 6.24E-07 |
| 4   | rs10494318  | 130115306 | A  | 0.2361  | 0.04689 | 0.1442  | 0.3279  | 5.035       | 6.24E-07 |
| 4   | rs11099003  | 130115445 | A  | 0.2361  | 0.04689 | 0.1442  | 0.3279  | 5.035       | 6.24E-07 |
| 4   | rs12512996  | 130115623 | C  | 0.2361  | 0.04689 | 0.1442  | 0.3279  | 5.035       | 6.24E-07 |
| 4   | rs12650648  | 130117960 | A  | 0.2361  | 0.04689 | 0.1442  | 0.3279  | 5.035       | 6.24E-07 |

Supplemental table 3 (continued)

|    |             |           |   |         |         |         |         |        |          |
|----|-------------|-----------|---|---------|---------|---------|---------|--------|----------|
| 4  | rs12650648  | 130117960 | A | 0.2361  | 0.04689 | 0.1442  | 0.3279  | 5.035  | 6.24E-07 |
| 4  | rs77506227  | 137329297 | A | -0.797  | 0.1633  | -1.117  | -0.4769 | -4.881 | 1.34E-06 |
| 4  | rs144061068 | 137341719 | C | -0.797  | 0.1633  | -1.117  | -0.4769 | -4.881 | 1.34E-06 |
| 4  | rs185142484 | 137341721 | T | -0.797  | 0.1633  | -1.117  | -0.4769 | -4.881 | 1.34E-06 |
| 5  | rs3762996   | 150469626 | T | 0.2238  | 0.04732 | 0.131   | 0.3165  | 4.729  | 2.78E-06 |
| 5  | rs4958886   | 150471564 | T | 0.2237  | 0.04712 | 0.1313  | 0.316   | 4.747  | 2.55E-06 |
| 5  | rs4958888   | 150472842 | A | 0.2245  | 0.04655 | 0.1333  | 0.3157  | 4.823  | 1.77E-06 |
| 5  | rs6579838   | 150473104 | C | 0.2339  | 0.0459  | 0.1439  | 0.3239  | 5.096  | 4.57E-07 |
| 10 | rs150945906 | 124487608 | A | -0.648  | 0.1359  | -0.9144 | -0.3816 | -4.768 | 2.31E-06 |
| 15 | rs147462127 | 24515682  | T | -0.8445 | 0.1697  | -1.177  | -0.5118 | -4.976 | 8.37E-07 |
| 15 | rs185845364 | 36865219  | G | -0.7974 | 0.1613  | -1.113  | -0.4813 | -4.944 | 9.79E-07 |
| 15 | rs117904408 | 36896306  | A | -0.7974 | 0.1613  | -1.113  | -0.4813 | -4.944 | 9.79E-07 |
| 15 | rs79271917  | 36927641  | C | -0.7744 | 0.158   | -1.084  | -0.4647 | -4.901 | 1.21E-06 |
| 17 | rs12948330  | 1872722   | A | -0.2143 | 0.04588 | -0.3043 | -0.1244 | -4.671 | 3.66E-06 |
| 17 | rs12451228  | 1877740   | C | -0.2153 | 0.04642 | -0.3063 | -0.1243 | -4.638 | 4.26E-06 |
| 17 | rs12948582  | 1879231   | A | -0.2152 | 0.04656 | -0.3064 | -0.1239 | -4.621 | 4.62E-06 |
| 17 | rs12946465  | 1879293   | C | -0.2189 | 0.04607 | -0.3092 | -0.1286 | -4.751 | 2.51E-06 |
| 19 | rs10415392  | 45719790  | T | 0.3449  | 0.07118 | 0.2054  | 0.4844  | 4.846  | 1.59E-06 |
| 20 | rs78923929  | 56754110  | A | -0.6559 | 0.1326  | -0.9158 | -0.3959 | -4.945 | 9.76E-07 |

chr=chromosome, SNP=single nucleotide polymorphism, SE=standard error

**Supplementary Table 4 | SNPs in LD with rs5605341**

| Chr | Position  | LD (r <sup>2</sup> ) | LD (D') | variant    | Ref | Alt | AFR freq | AMR freq | ASN freq | EUR freq | Sig level this GWAS |
|-----|-----------|----------------------|---------|------------|-----|-----|----------|----------|----------|----------|---------------------|
| 4   | 129164325 | 1                    | 1       | rs56405341 | G   | A   | 0.18     | 0.23     | 0.09     | 0.27     | 4.822E-08           |
| 4   | 129174907 | 0.82                 | 0.95    | rs17431373 | G   | A   | 0.2      | 0.25     | 0.14     | 0.29     | 4.211E-07           |
| 4   | 129175665 | 0.81                 | 0.94    | rs11729109 | G   | A   | 0.2      | 0.25     | 0.14     | 0.29     | 4.211E-07           |
| 4   | 129178831 | 0.81                 | 0.94    | rs1588808  | A   | C   | 0.23     | 0.26     | 0.14     | 0.29     | 4.211E-07           |
| 4   | 129186321 | 0.81                 | 0.93    | rs35311431 | G   | T   | 0.21     | 0.25     | 0.15     | 0.29     | 4.211E-07           |
| 4   | 129186454 | 0.81                 | 0.94    | rs34495244 | A   | G   | 0.21     | 0.25     | 0.15     | 0.29     | 4.211E-07           |
| 4   | 129186600 | 0.8                  | 0.93    | rs13131099 | T   | C   | 0.21     | 0.25     | 0.15     | 0.28     | 4.211E-07           |
| 4   | 129186664 | 0.81                 | 0.94    | rs13131323 | T   | G   | 0.21     | 0.25     | 0.15     | 0.29     | 4.211E-07           |
| 4   | 129186709 | 0.81                 | 0.94    | rs13103701 | C   | T   | 0.21     | 0.25     | 0.15     | 0.29     | 4.211E-07           |
| 4   | 129187069 | 0.8                  | 0.93    | rs13137298 | T   | C   | 0.2      | 0.25     | 0.15     | 0.29     | 4.211E-07           |
| 4   | 129187123 | 0.8                  | 0.93    | rs13110313 | G   | A   | 0.2      | 0.25     | 0.15     | 0.29     | 4.211E-07           |
| 4   | 129187363 | 0.8                  | 0.93    | rs11731055 | C   | T   | 0.2      | 0.25     | 0.15     | 0.29     | 4.211E-07           |
| 4   | 129191817 | 0.81                 | 0.94    | rs17790747 | C   | A   | 0.21     | 0.25     | 0.15     | 0.29     | 4.211E-07           |
| 4   | 129191900 | 0.81                 | 0.94    | rs60645642 | A   | T   | 0.21     | 0.25     | 0.15     | 0.29     | 4.211E-07           |
| 4   | 129192926 | 0.81                 | 0.94    | rs11099002 | G   | A   | 0.21     | 0.25     | 0.15     | 0.29     | 4.211E-07           |
| 4   | 129193693 | 0.81                 | 0.94    | rs10518545 | A   | G   | 0.21     | 0.25     | 0.15     | 0.29     | 6.238E-07           |
| 4   | 129193922 | 0.81                 | 0.94    | rs11737273 | T   | A   | 0.21     | 0.25     | 0.15     | 0.29     | 6.238E-07           |
| 4   | 129193989 | 0.81                 | 0.94    | rs11732872 | C   | T   | 0.21     | 0.25     | 0.15     | 0.29     | 6.238E-07           |
| 4   | 129194151 | 0.81                 | 0.94    | rs10494318 | G   | A   | 0.21     | 0.25     | 0.15     | 0.29     | 6.238E-07           |
| 4   | 129194290 | 0.81                 | 0.94    | rs11099003 | G   | A   | 0.21     | 0.25     | 0.15     | 0.29     | 6.238E-07           |
| 4   | 129194468 | 0.81                 | 0.94    | rs12512996 | T   | C   | 0.23     | 0.26     | 0.15     | 0.29     | 6.238E-07           |
| 4   | 129196805 | 0.81                 | 0.94    | rs12650648 | G   | A   | 0.21     | 0.25     | 0.15     | 0.29     | 6.238E-07           |

chr=chromosome, LD=linkage disequilibrium, AFR=African, AMR=American, ASN=Asian, EUR=European

**Supplemental Table 5 | Associations in PART with known AD and PSP risk alleles**

| Chr | SNP         | Base pair | GENE       | A1 | Associated disease | beta    | SE     | L95    | U95    | t-statistic | p             |
|-----|-------------|-----------|------------|----|--------------------|---------|--------|--------|--------|-------------|---------------|
| 14  | rs12590654  | 92938855  | SLC24A4    | A  | AD                 | -0.1416 | 0.0445 | -0.229 | -0.054 | -3.1850     | <b>0.0015</b> |
| 11  | rs1582763   | 60021948  | MS4A6A     | A  | AD                 | -0.1074 | 0.0435 | -0.193 | -0.022 | -2.4690     | <b>0.0138</b> |
| 11  | rs2081545   | 59958380  | MS4A6A     | A  | AD                 | -0.1029 | 0.0436 | -0.188 | -0.017 | -2.3610     | <b>0.0185</b> |
| 4   | rs7657553   | 11723235  | HS3ST1     | A  | AD                 | 0.1082  | 0.0483 | 0.014  | 0.203  | 2.2390      | <b>0.0255</b> |
| 17  | rs242557    | 44019712  | MAPT       | A  | PSP                | 0.1046  | 0.0468 | 0.013  | 0.196  | 2.2370      | <b>0.0256</b> |
| 11  | rs7935829   | 59942815  | MS4A6A     | G  | AD                 | -0.0957 | 0.0433 | -0.181 | -0.011 | -2.2110     | <b>0.0274</b> |
| 2   | rs7571971   | 88895351  | EIF2AK3    | T  | PSP                | -0.0990 | 0.0474 | -0.192 | -0.006 | -2.0870     | <b>0.0373</b> |
| 17  | rs8070723   | 44081064  | MAPT       | G  | PSP                | -0.0907 | 0.0525 | -0.194 | 0.012  | -1.7290     | 0.0843        |
| 11  | rs11218343  | 121435587 | SORL1      | C  | AD                 | 0.1607  | 0.0952 | -0.026 | 0.347  | 1.6880      | 0.0920        |
| 1   | rs4575098   | 161155392 | ADAMTS4    | A  | AD                 | 0.0803  | 0.0499 | -0.018 | 0.178  | 1.6090      | 0.1082        |
| 12  | rs11568563  | 21457434  | SLCO1A2    | G  | PSP                | -0.1419 | 0.0916 | -0.321 | 0.038  | -1.5490     | 0.1220        |
| 16  | rs59735493  | 31133100  | KAT8       | A  | AD                 | 0.0666  | 0.0470 | -0.026 | 0.159  | 1.4160      | 0.1572        |
| 11  | rs867611    | 85776544  | PICALM     | G  | AD                 | 0.0636  | 0.0452 | -0.025 | 0.152  | 1.4080      | 0.1597        |
| 11  | rs3844143   | 85850243  | PICALM     | T  | AD                 | -0.0531 | 0.0425 | -0.136 | 0.030  | -1.2510     | 0.2114        |
| 2   | rs4663105   | 127891427 | BIN1       | C  | AD                 | 0.0520  | 0.0439 | -0.034 | 0.138  | 1.1840      | 0.2368        |
| 7   | rs1859788   | 99971834  | ZCWPW1     | A  | AD                 | -0.0544 | 0.0461 | -0.145 | 0.036  | -1.1790     | 0.2390        |
| 17  | rs28394864  | 47450775  | ABI3       | A  | AD                 | -0.0485 | 0.0430 | -0.133 | 0.036  | -1.1270     | 0.2603        |
| 11  | rs10792832  | 85867875  | PICALM     | A  | AD                 | 0.0473  | 0.0439 | -0.039 | 0.133  | 1.0780      | 0.2816        |
| 7   | rs7384878   | 99932049  | ZCWPW1     | C  | AD                 | -0.0498 | 0.0465 | -0.141 | 0.041  | -1.0710     | 0.2844        |
| 10  | rs11257238  | 11717397  | ECHDC3     | C  | AD                 | 0.0446  | 0.0440 | -0.042 | 0.131  | 1.0150      | 0.3106        |
| 6   | rs9381563   | 47432637  | CD2AP      | C  | AD                 | 0.0436  | 0.0444 | -0.043 | 0.131  | 0.9825      | 0.3262        |
| 18  | rs76726049  | 56189459  | ALPK2      | C  | AD                 | -0.1423 | 0.1499 | -0.436 | 0.151  | -0.9496     | 0.3427        |
| 19  | rs76320948  | 46241841  | AC074212.3 | T  | AD                 | 0.1188  | 0.1253 | -0.127 | 0.364  | 0.9478      | 0.3436        |
| 6   | rs12203592  | 396321    | IRF4       | T  | PSP                | -0.0367 | 0.0521 | -0.139 | 0.065  | -0.7044     | 0.4814        |
| 19  | rs111278892 | 1039323   | ABCA7      | G  | AD                 | -0.0431 | 0.0623 | -0.165 | 0.079  | -0.6919     | 0.4892        |
| 6   | rs6931277   | 32583357  | HLA-DRB1   | T  | AD                 | -0.0356 | 0.0545 | -0.143 | 0.071  | -0.6530     | 0.5140        |
| 1   | rs6656401   | 207692049 | CR1        | A  | AD                 | -0.0329 | 0.0587 | -0.148 | 0.082  | -0.5615     | 0.5746        |
| 17  | rs9916042   | 4984447   | SCIMP      | A  | AD                 | 0.0263  | 0.0475 | -0.067 | 0.119  | 0.5547      | 0.5793        |
| 1   | rs2093760   | 207786828 | CR1        | A  | AD                 | -0.0315 | 0.0575 | -0.144 | 0.081  | -0.5483     | 0.5837        |
| 1   | rs1411478   | 180962282 | STX6       | A  | PSP                | -0.0236 | 0.0437 | -0.109 | 0.062  | -0.5397     | 0.5896        |
| 1   | rs679515    | 207750568 | CR1        | T  | AD                 | -0.0311 | 0.0588 | -0.146 | 0.084  | -0.5292     | 0.5969        |
| 8   | rs1532278   | 27466315  | CLU/PTK2B  | T  | AD                 | 0.0213  | 0.0448 | -0.067 | 0.109  | 0.4746      | 0.6352        |

Supplemental table 5 (continued)

|    |             |           |            |   |     |         |        |        |       |         |        |
|----|-------------|-----------|------------|---|-----|---------|--------|--------|-------|---------|--------|
| 15 | rs117618017 | 63569902  | APH1B      | T | AD  | -0.0294 | 0.0654 | -0.158 | 0.099 | -0.4490 | 0.6536 |
| 19 | rs4147929   | 1063443   | ABCA7      | A | AD  | -0.0258 | 0.0579 | -0.139 | 0.088 | -0.4455 | 0.6561 |
| 2  | rs10933431  | 233981912 | INPPD5     | G | AD  | 0.0182  | 0.0494 | -0.079 | 0.115 | 0.3673  | 0.7136 |
| 17 | rs113260531 | 5138980   | SCIMP      | A | AD  | -0.0246 | 0.0670 | -0.156 | 0.107 | -0.3666 | 0.7140 |
| 19 | rs75627662  | 45413576  | APOE       | T | AD  | -0.0215 | 0.0607 | -0.140 | 0.097 | -0.3538 | 0.7236 |
| 4  | rs6448453   | 11026028  | CLNK       | A | AD  | -0.0159 | 0.0470 | -0.108 | 0.076 | -0.3392 | 0.7346 |
| 4  | rs6448451   | 11024682  | CLNK       | G | AD  | -0.0156 | 0.0470 | -0.108 | 0.077 | -0.3310 | 0.7408 |
| 19 | rs3752241   | 1053524   | ABCA7      | G | AD  | 0.0190  | 0.0584 | -0.095 | 0.133 | 0.3261  | 0.7444 |
| 1  | rs6687758   | 222164948 | DUSP10     | G | PSP | 0.0177  | 0.0547 | -0.090 | 0.125 | 0.3241  | 0.7460 |
| 10 | rs11257242  | 11721119  | ECHDC3     | C | AD  | -0.0136 | 0.0445 | -0.101 | 0.074 | -0.3049 | 0.7606 |
| 8  | rs4236673   | 27464929  | CLU/PTK2B  | A | AD  | 0.0116  | 0.0447 | -0.076 | 0.099 | 0.2593  | 0.7955 |
| 3  | rs1768208   | 39523003  | MOBP       | T | PSP | 0.0110  | 0.0472 | -0.082 | 0.104 | 0.2330  | 0.8158 |
| 19 | rs41289512  | 45351516  | APOE       | G | AD  | 0.0237  | 0.1369 | -0.245 | 0.292 | 0.1729  | 0.8628 |
| 19 | rs41289512  | 45351516  | APOE       | G | AD  | 0.0237  | 0.1369 | -0.245 | 0.292 | 0.1729  | 0.8628 |
| 15 | rs442495    | 59022615  | ADAM10     | C | AD  | -0.0038 | 0.0465 | -0.095 | 0.087 | -0.0810 | 0.9355 |
| 20 | rs6014724   | 54998544  | CASS4      | G | AD  | -0.0055 | 0.0709 | -0.144 | 0.133 | -0.0770 | 0.9387 |
| 17 | rs2632516   | 56409089  | BZRAP1-AS1 | C | AD  | -0.0019 | 0.0450 | -0.090 | 0.086 | -0.0412 | 0.9672 |
| 7  | rs11763230  | 143108841 | EPHA1      | T | AD  | -0.0021 | 0.0567 | -0.113 | 0.109 | -0.0375 | 0.9701 |
| 19 | rs3865444   | 51727962  | CD33       | A | AD  | 0.0015  | 0.0459 | -0.088 | 0.092 | 0.0333  | 0.9735 |
| 7  | rs7810606   | 143108158 | EPHA1      | T | AD  | -0.0012 | 0.0426 | -0.085 | 0.082 | -0.0284 | 0.9773 |

chr=chromosome, SNP=single nucleotide polymorphism, SE=standard error

**Supplementary Table 6 | Assessments of JADE1 and P-tau immunohistochemistry on tauopathy subjects**

**JADE1 immunohistochemistry**

| Case | Diagnosis   | Age | Sex | NFT burden | CTE lesion | ARTAG | Astrocytic plaques | tufted astrocytes | coiled bodies | A $\beta$ plaque neurites | Other pathology |
|------|-------------|-----|-----|------------|------------|-------|--------------------|-------------------|---------------|---------------------------|-----------------|
| 1    | PART        | 90  | F   | +++        | N          | 0     | 0                  | 0                 | 0             | 0                         |                 |
| 2    | PART        | 90  | F   | +          | N          | 0     | 0                  | 0                 | 0             | 0                         |                 |
| 3    | PART        | 81  | M   | +          | N          | 0     | 0                  | 0                 | 0             | 0                         |                 |
| 4    | AD          | 82  | M   | +++        | N          | 0     | 0                  | 0                 | 0             | +                         |                 |
| 5    | AD          | 63  | M   | +          | N          | +     | +                  | 0                 | +             | 2                         |                 |
| 6    | AD          | 83  | F   | +++        | N          | +     | 0                  | 0                 | 0             | 2                         |                 |
| 7    | PSP         | 69  | M   | +          | N          | +     | ++                 | ++                | 2             | 0                         |                 |
| 8    | PSP         | 71  | M   | ++         | N          | 0     | +                  | +                 | +             | 0                         |                 |
| 9    | PSP         | 64  | M   | +          | N          | 0     | 0                  | +                 | +             | 0                         |                 |
| 10   | CBD         | 72  | M   | +          | N          | 0     | 0                  | 0                 | 0             | 0                         |                 |
| 11   | CBD         | 75  | F   | +          | N          | 0     | +                  | +                 | 0             | 0                         |                 |
| 12   | CBD         | 63  | XX  | +          | N          | 0     | ++                 | 0                 | 0             | 0                         |                 |
| 13   | CTE         | XX  | XX  | +          | Y          | +     | +                  | 0                 | 0             | +                         |                 |
| 14   | CTE         | 83  | M   | ++         | Y          | ++    | ++                 | +                 | +             | 0                         |                 |
| 15   | CTE         | 77  | M   | ++         | Y          | ++    | ++                 | +                 | +             | 2                         |                 |
| 16   | .GD, AD, CT | 85  | M   | +          | N          | ++    | 0                  | 0                 | 0             | +                         | +/- (grains)    |
| 17   | AGD, PART   | 88  | F   | +          | N          | +     | +                  | 0                 | 0             | 0                         | +/- (grains)    |
| 17   | PiD         | 40  | M   | 0          | N          | 0     | 0                  | 0                 | 0             | 0                         |                 |
| 18   | PiD         | XX  | XX  | 0          | N          | 0     | 0                  | 0                 | 0             | 0                         |                 |
| 19   | PiD         | XX  | XX  | 0          | N          | 0     | 0                  | 0                 | 0             | 0                         |                 |

Scale: 0 none, + mild, ++ moderate, +++ severe pathology; HP (hippocampus), STN (subthalamic nucleus), F (frontal)



Supplemental table 6 (continued)

| P-tau immunohistochemistry |            |       |                    |                   |               |                           |                       |                 |
|----------------------------|------------|-------|--------------------|-------------------|---------------|---------------------------|-----------------------|-----------------|
| NFT burden                 | CTE lesion | ARTAG | Astrocytic plaques | tufted astrocytes | coiled bodies | A $\beta$ plaque neurites | Other pathology       | Regions checked |
| +++                        | N          | 0     | 0                  | 0                 | 0             | 0                         |                       | HP              |
| ++                         | N          | 0     | 0                  | 0                 | 0             | 0                         |                       | HP              |
| ++                         | N          | 0     | 0                  | 0                 | 0             | 0                         |                       | HP              |
| +++                        | N          | +     | 0                  | 0                 | 0             | +++                       |                       | HP              |
| +                          | N          | +     | +                  | 0                 | +             | ++                        |                       | HP              |
| +++                        | N          | +     | 0                  | 0                 | +             | ++                        |                       | HP              |
| ++                         | N          | +     | ++                 | ++                | ++            | 0                         |                       | STN             |
| +++                        | N          | ++    | ++                 | ++                | ++            | 0                         | +/- (grains)          | STN             |
| +                          | N          | +     | 0                  | +                 | +             | 0                         |                       | STN             |
| +++                        | N          | ++    | ++                 | ++                | 0             | 0                         | +/- (grains)          | F               |
| +                          | N          | +     | ++                 | +                 | +             | 0                         |                       | F               |
| ++                         | N          | +     | +++                | +                 | +             | 0                         |                       | F               |
| +                          | Y          | ++    | ++                 | +                 | 0             | 0                         | +/- (grains)          | F               |
| ++                         | Y          | +++   | ++                 | ++                | +             | 0                         |                       | F               |
| +++                        | Y          | +++   | ++                 | +                 | +             | 0                         |                       | F               |
| +++                        | N          | +++   | +                  | +                 | +             | +                         | +/- (grains)          | HP              |
| +++                        | N          | ++    | 0                  | +                 | 0             | 0                         | +/- (grains)          | HP              |
| +++                        | N          | +     | 0                  | 0                 | 0             | 0                         | (grains), Pick bodies | F               |
| ++                         | N          | ++    | 0                  | 0                 | +             | 0                         | Pick bodies           | HP              |
| +++                        | N          | ++    | 0                  | 0                 | +             | 0                         | Pick bodies           | HP              |
